# Supplementary material
Source: publisher figshare collection journal article supplement (https://acs.figshare.com/ndownloader/files/17273264)
Supplement: Supplementary file 1 [file 17273264]

## Supporting Information

# Facile Incorporation of Aggregation Induced Emission Active Conjugated Polymer into Mesoporous Silica Hollow Nanospheres: Synthesis, Characterization, Photophysical Studies and Application in Bioimaging

Sengottuvelu Dineshkumar,<sup>\*,a</sup> Abhishek Raj,<sup>a</sup> Abhilasha Srivastava,<sup>b</sup> Sudeshna Mukherjee,<sup>b</sup> Sheik Saleem Pasha,<sup>a</sup> Vishal Kachwal,<sup>a</sup> Leena Fageria,<sup>b</sup> Rajdeep Chowdhury<sup>\*,b</sup> and Inamur Rahaman Laskar<sup>\*,a</sup>

*<sup>a</sup>Department of Chemistry, Birla Institute of Technology and Science, Pilani Campus, Pilani, Rajasthan 333031, India.*

*<sup>b</sup>Department of Biological Sciences, Birla Institute of Technology and Science, Pilani Campus, Pilani, Rajasthan 333031, India.*

\*E-mail: dineshchemsrkv@gmail.com, ir\_laskar@pilani.bits-pilani.ac.in

## Table of contents

1. **Figure S1.** FT-IR spectrum of (a) compound 5, (b) compound 4 and (c) PTPA polymer
2. **Figure S2.**  $^1\text{H}$  NMR spectrum of 1
3. **Figure S3.**  $^{13}\text{C}$  NMR spectrum of 1
4. **Figure S4.**  $^1\text{H}$  NMR spectrum of 2
5. **Figure S5.**  $^{13}\text{C}$  NMR spectrum of 2
6. **Figure S6.**  $^1\text{H}$  NMR spectrum of 3
7. **Figure S7.**  $^{13}\text{C}$  NMR spectrum of 3
8. **Figure S8.**  $^1\text{H}$  NMR spectrum of 4
9. **Figure S9.**  $^{13}\text{C}$  NMR spectrum of 4
10. **Figure S10.**  $^1\text{H}$  NMR spectrum of compound 5
11. **Figure S11.**  $^{13}\text{C}$ -NMR spectrum of compound 5
12. **Figure S12.**  $^1\text{H}$  NMR spectrum of PTPA polymer
13. **Figure S13.** Mass spectrum of compound 1
14. **Figure S14.** Mass spectrum of compound 2
15. **Figure S15.** Mass spectrum of compound 4
16. **Figure S16.** Solid state UV-visible spectrum of PTPA polymer
17. **Figure S17.** Solid state PL emission spectrum of PTPA polymer
18. **Figure S18.** UV absorbance spectrum of PTPA polymer in THF solution
19. **Figure S19.** Average particle size distribution of 90% THF-water mixture of PTPA
20. **Figure S20.** (a) PL spectra of PTPA in THF/PEG mixed solvents with different water fractions ( $f_{\text{PEG}}$ ) with excitation at 390 nm; and (b) the changes of the PL intensity with different  $f_{\text{PEG}}$  excitation at 390 nm. (c) Photographs of PTPA in THF/PEG mixtures with different fractions of PEG taken under UV illumination.
21. **Figure S21.** Average particle size distribution of MSHNs-GTMS and Apt-MSHNs in aqueous medium

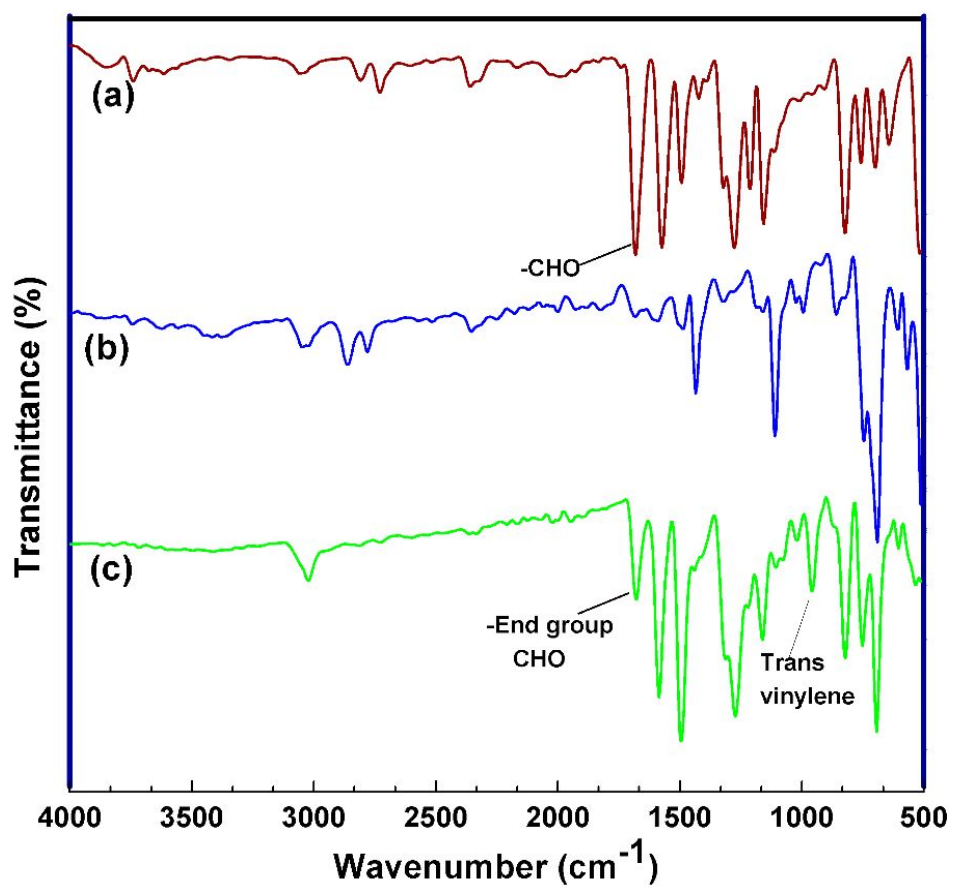

Figure S1. FT-IR spectrum of (a) compound 5, (b) compound 4 and (c) PTPA polymer

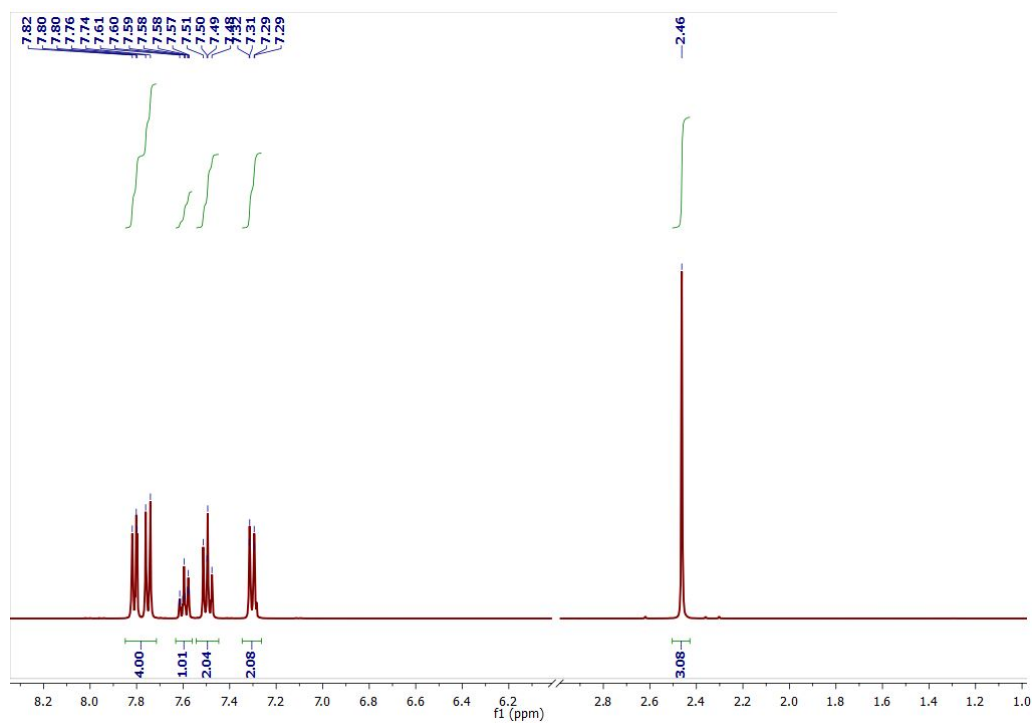

**Figure S2.** <sup>1</sup>H NMR spectrum of **1**

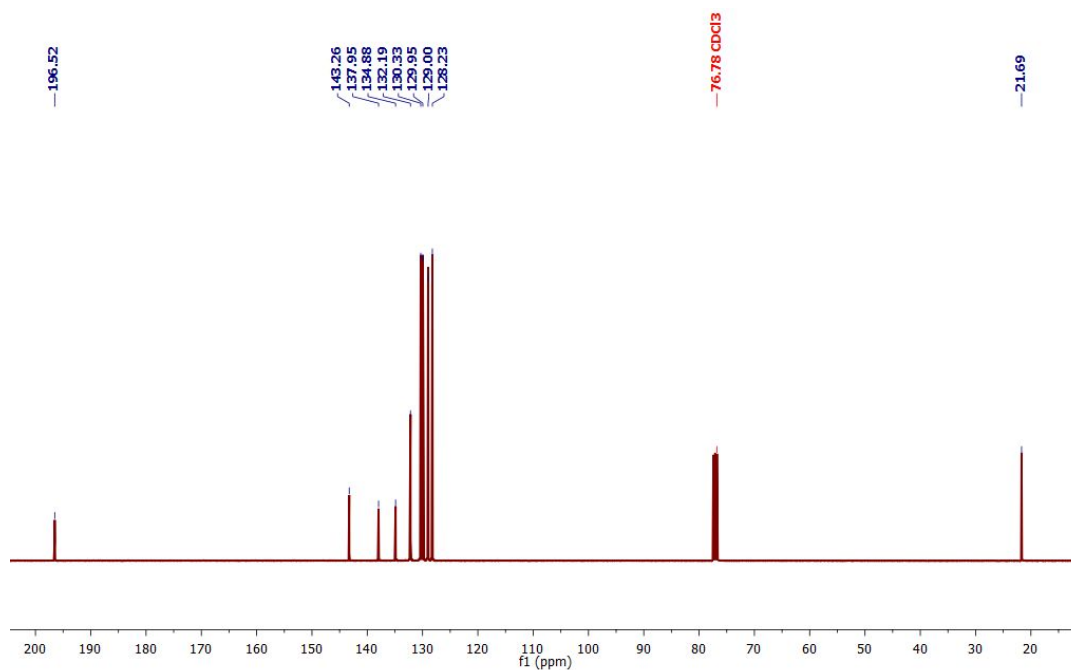

**Figure S3.** <sup>13</sup>C NMR spectrum of **1**

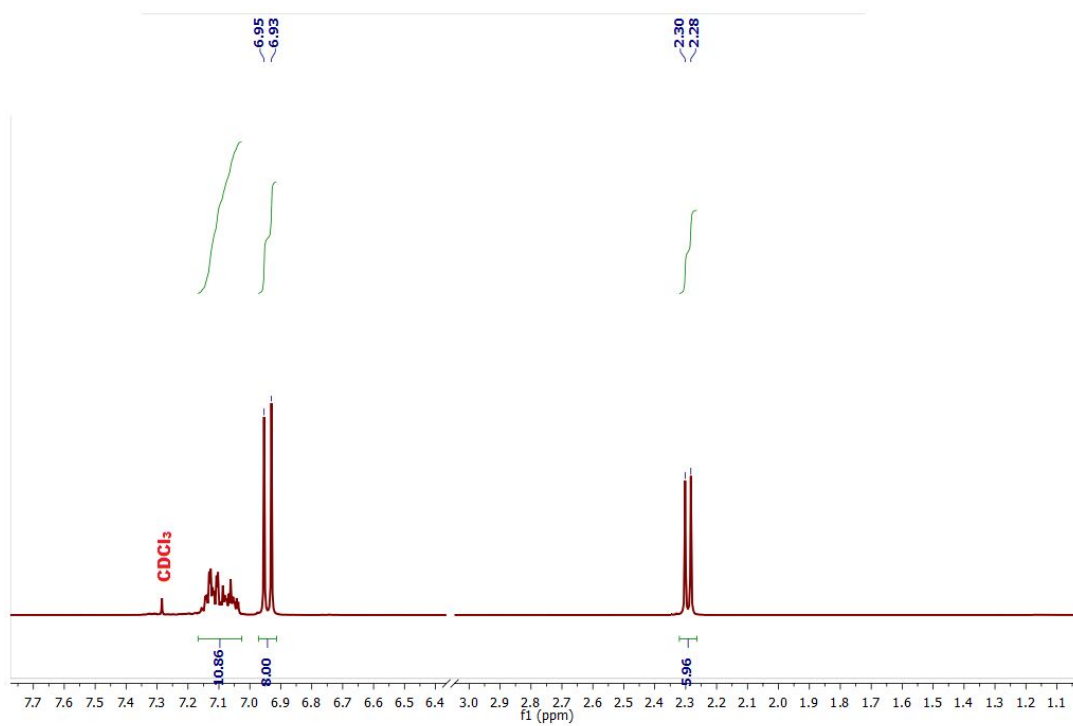

**Figure S4.** <sup>1</sup>H NMR spectrum of **2**

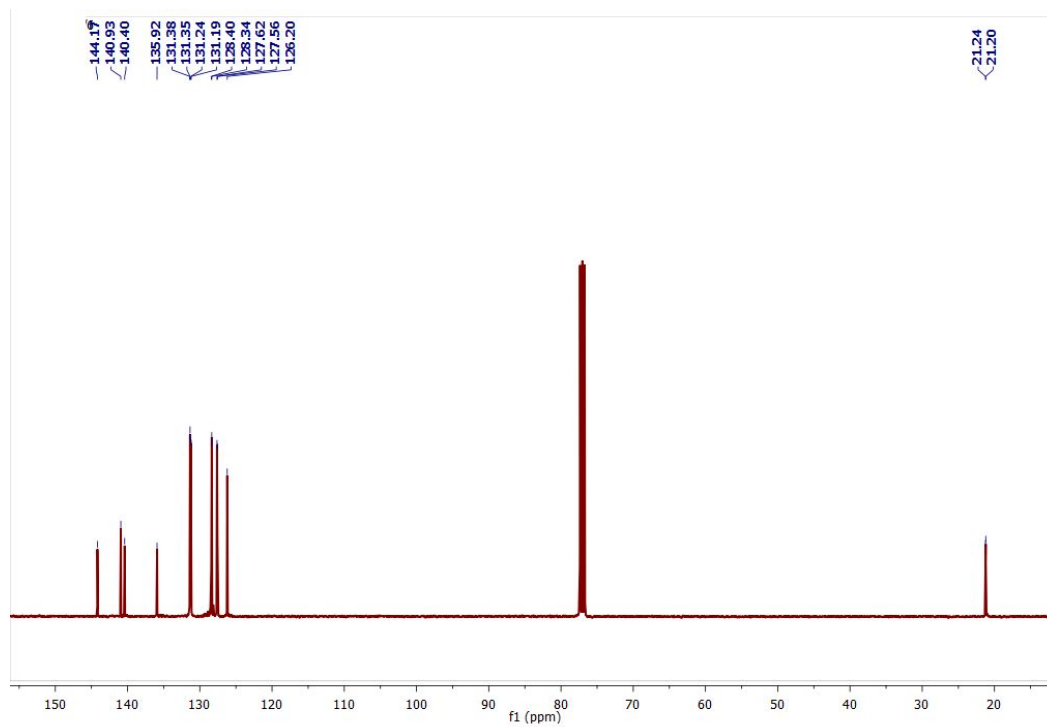

**Figure S5.** <sup>13</sup>C NMR spectrum of **2**



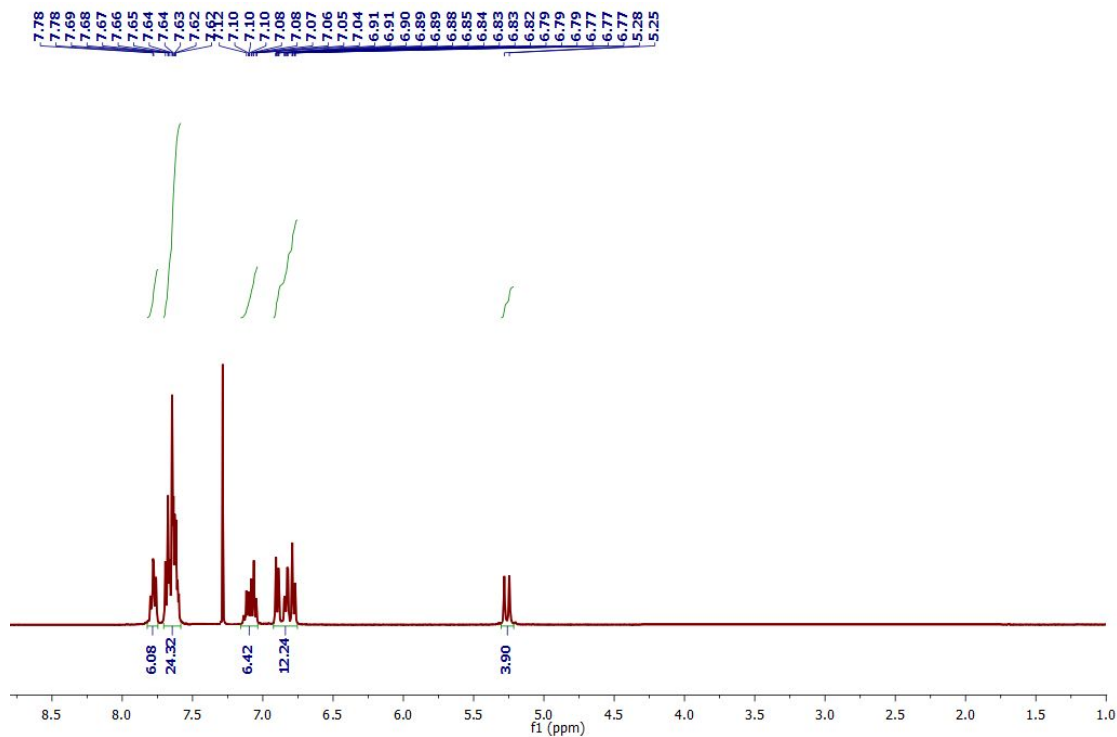

Figure S8.  $^1\text{H}$  NMR spectrum of **4**

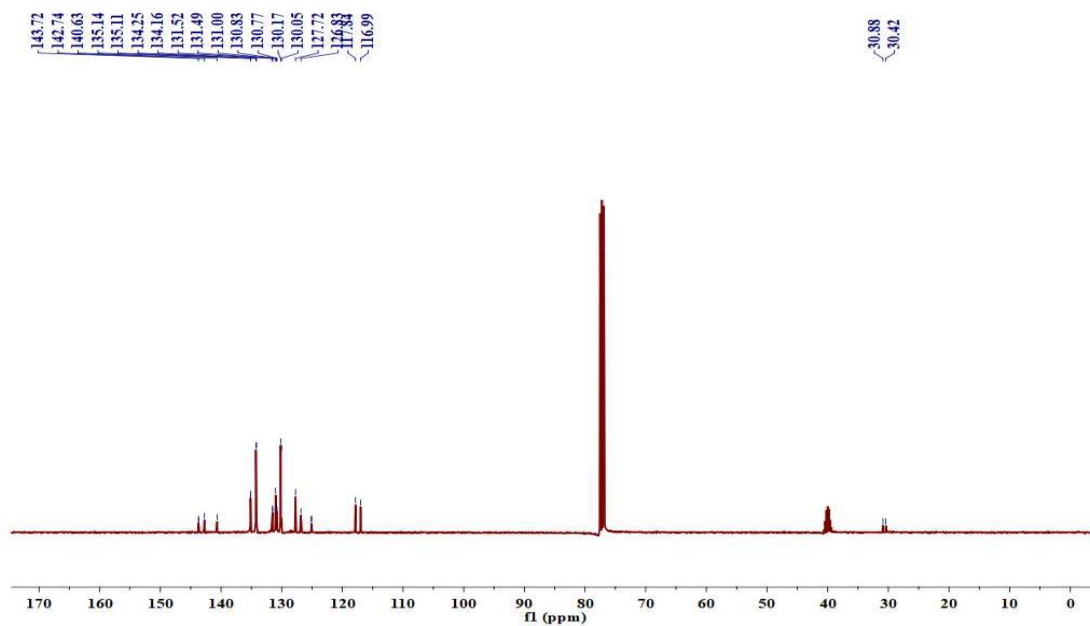

Figure S9.  $^{13}\text{C}$  NMR spectrum of **4**

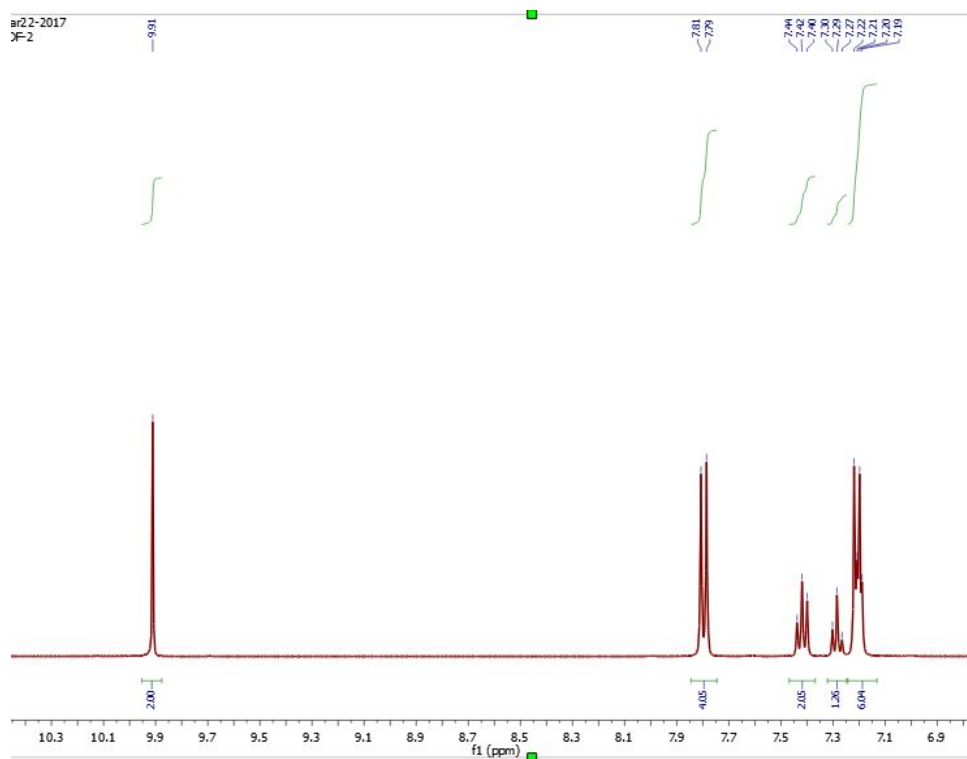

**Figure S10.**  $^1\text{H}$  NMR spectrum of compound **5**

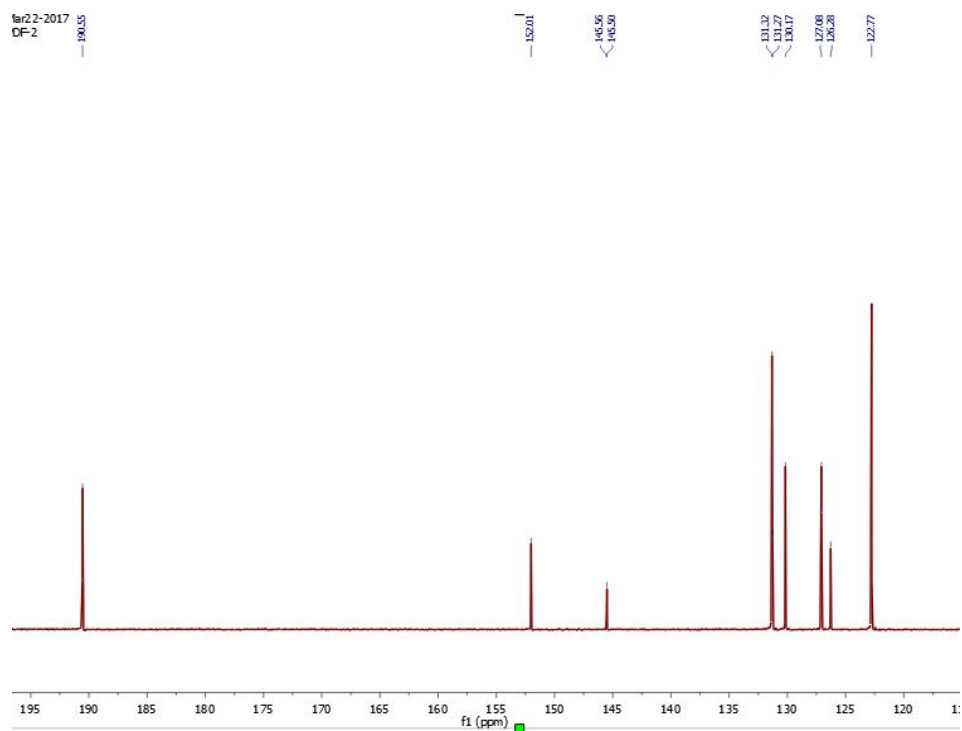

**Figure S11.**  $^{13}\text{C}$ -NMR spectrum of compound **5**



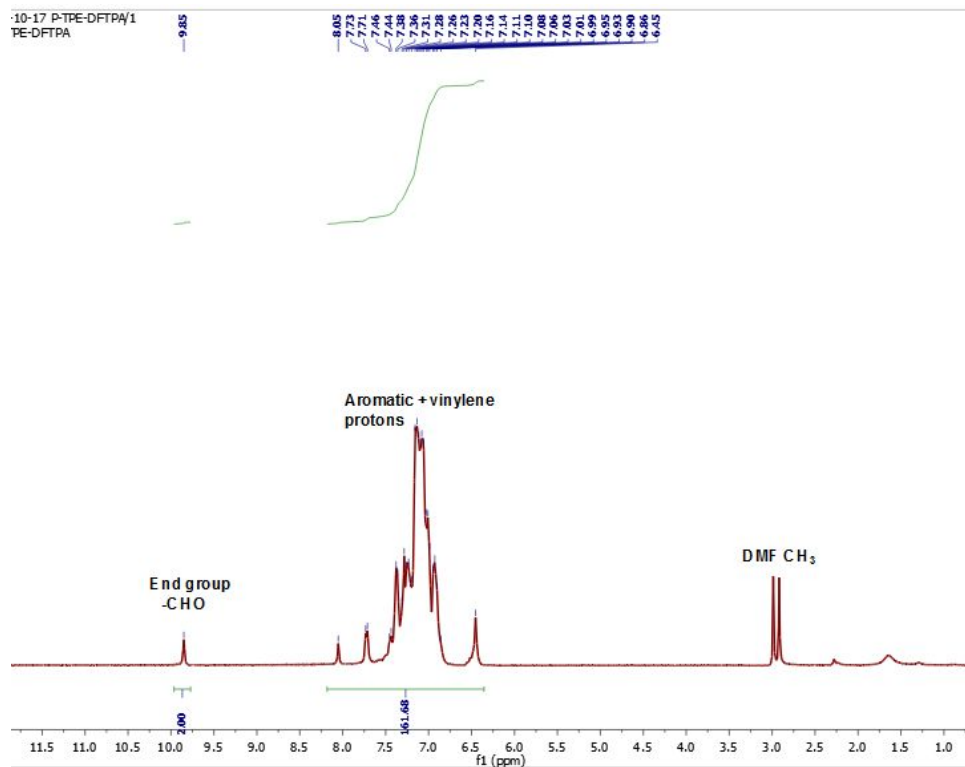

**Figure S12.** <sup>1</sup>H NMR spectrum of PTPA polymer

#### MS Zoomed Spectrum

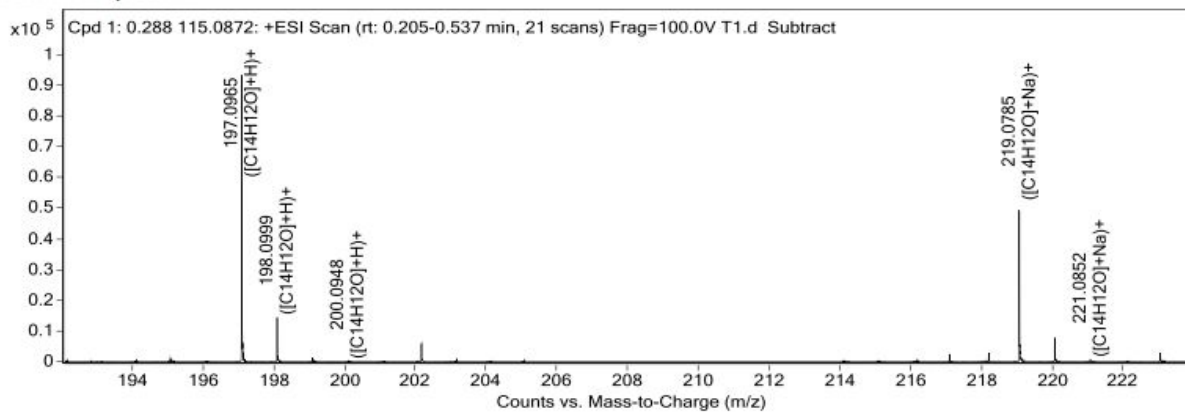

**Figure S13.** Mass spectrum of compound 1

Cpd 1: 0.277 371.1020; +ESI Scan (rt: 0.194-0.492 min, 19 scans) Frag=100.0V T2.d Subtract

Mass spectrum showing relative intensity (y-axis, scaled by  $\times 10^4$ ) versus mass-to-charge ratio (x-axis, Counts vs. Mass-to-Charge (m/z)). The spectrum displays several peaks, with the base peak at m/z 360.1879 [C<sub>28</sub>H<sub>24</sub>]<sup>+</sup>. Other labeled peaks include m/z 361.1915 [C<sub>28</sub>H<sub>24</sub>]<sup>+</sup>, m/z 383.1739 [(C<sub>28</sub>H<sub>24</sub>)+Na]<sup>+</sup>, and m/z 385.1739.

**Figure S14.** Mass spectrum of compound **2**

Cpd 1: 0.252 441.1878: +ESI Scan (rt: 0.202-0.467 min, 17 scans) Frag=100.0V T4.d Subtract

Mass spectrum showing relative intensity (Y-axis, 0 to 3.0) versus mass-to-charge ratio (X-axis, 1040 to 1066). The spectrum displays several peaks, with the most prominent ones labeled as follows:

| Mass-to-Charge Ratio (m/z) | Chemical Formula                                                |
|----------------------------|-----------------------------------------------------------------|
| 1043.2001                  | $[\text{C}_{64}\text{H}_{52}\text{Br}_2\text{P}_2+\text{H}]^+$  |
| 1045.2003                  | $[\text{C}_{64}\text{H}_{52}\text{Br}_2\text{P}_2+\text{H}]^+$  |
| 1063.1804                  | $[\text{C}_{64}\text{H}_{52}\text{Br}_2\text{P}_2+\text{Na}]^+$ |
| 1065.1792                  | $[\text{C}_{64}\text{H}_{52}\text{Br}_2\text{P}_2+\text{Na}]^+$ |
| 1067.1795                  | $[\text{C}_{64}\text{H}_{52}\text{Br}_2\text{P}_2+\text{Na}]^+$ |

**Figure S15.** Mass spectrum of compound **4**

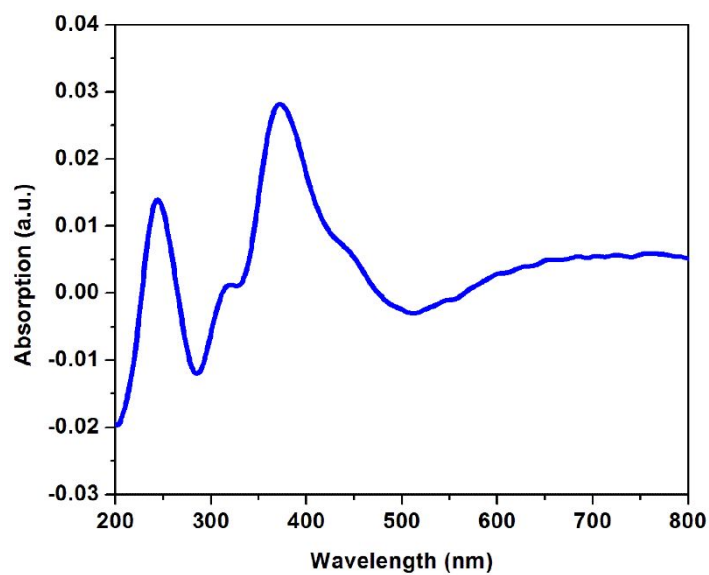

**Figure S16.** Solid state UV-visible spectrum of PTPA polymer

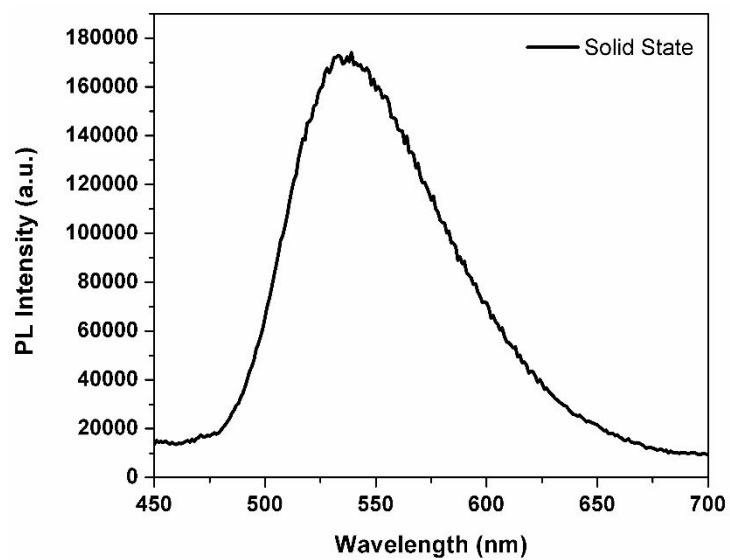

**Figure S17.** Solid state PL spectrum of PTPA polymer

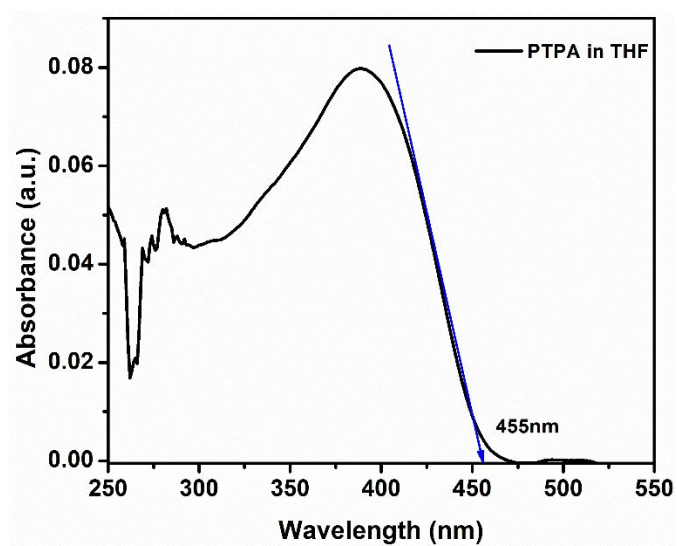

**Figure S18.** UV absorbance spectrum of PTPA polymer in THF solution

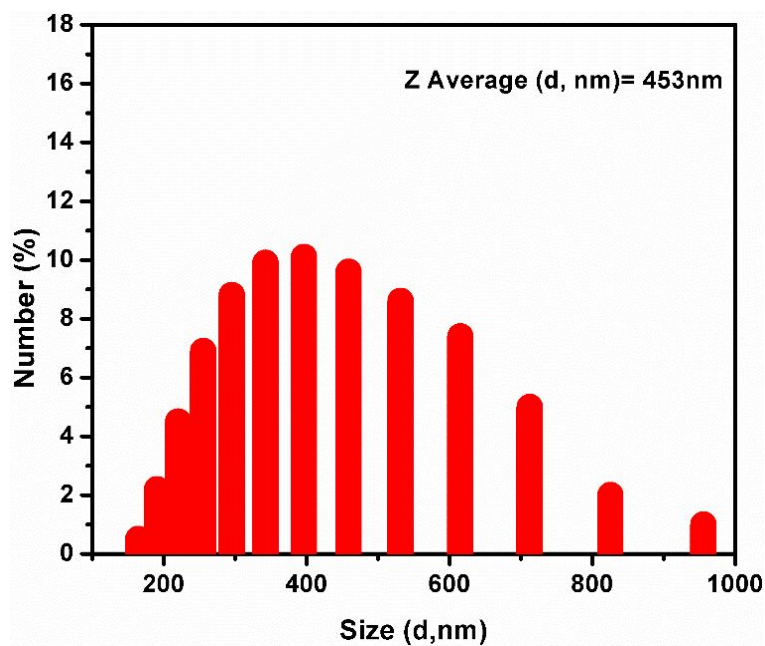

**Figure S19.** Average particle size distribution of 90% THF-water mixture of *PTPA*

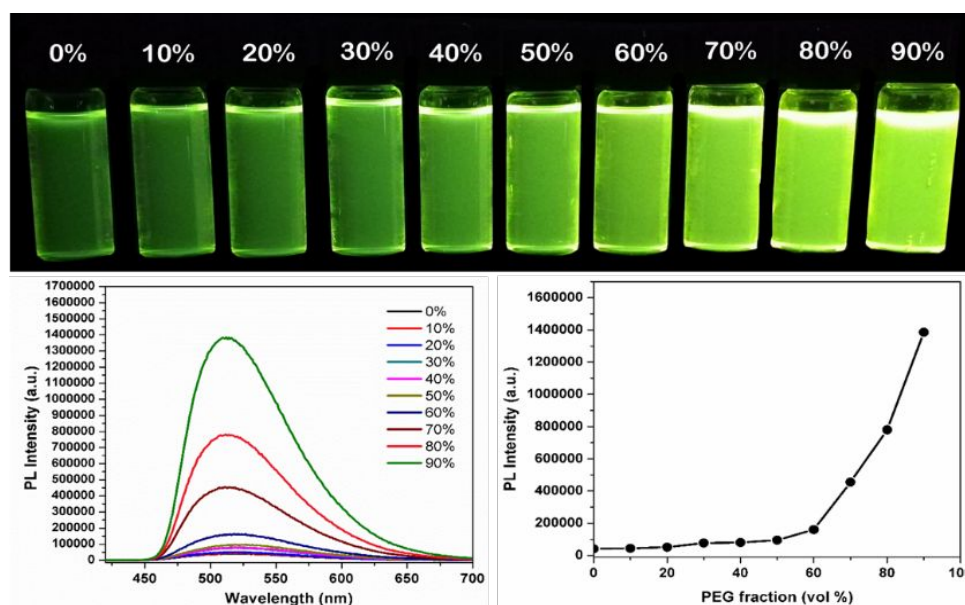

**Figure S20** (a) PL spectra of **PTPA** in THF/PEG mixed solvents with different water fractions ( $f_{\text{PEG}}$ ) with excitation at 390 nm; and (b) the changes of the PL intensity with different  $f_{\text{PEG}}$  excitation at 390 nm. (c) Photographs of **PTPA** in THF/PEG mixtures with different fractions of PEG taken under UV illumination.

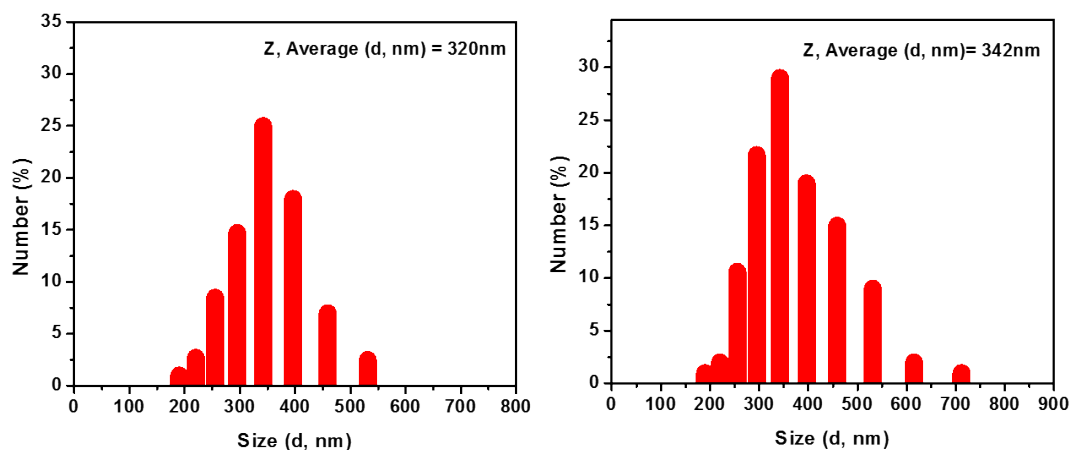

**Figure S21.** Average particle size distribution of *MSHNs*-GTMS and Apt-*MSHNs* in aqueous medium
